# Supplementary material for: Underlying Causes of Death among Adults with Cerebral Palsy
Source: MDPI journal article supplement (doi:10.3390/jcm11216333), 2022-10-27
Supplement: s1 [file s1]

**Supplemental Table S1. Adults that died in 2019, with the underlying cause of death listed as “cerebral palsy”, and 6443 unique combinations of multiple causes of death.**

| <b>Population n=246,614,107</b>                                                                               | <b>Deaths</b> | <b>Crude Rate<br/>Per 100,000</b> | <b>95% CI</b> |
|---------------------------------------------------------------------------------------------------------------|---------------|-----------------------------------|---------------|
| A00-B99 (Certain infectious and parasitic diseases)                                                           | 205           | 0.1                               | 0.1-0.1       |
| A04.7 (Enterocolitis due to Clostridium difficile)                                                            | 5             |                                   |               |
| A09.9 (Gastroenteritis and colitis of unspecified origin)                                                     | 2             |                                   |               |
| A16.9 (Respiratory tuberculosis unspecified, without mention of bacteriological or histological confirmation) | 1             |                                   |               |
| A41.4 (Septicaemia due to anaerobes)                                                                          | 1             |                                   |               |
| A41.5 (Septicaemia due to other Gram-negative organisms)                                                      | 1             |                                   |               |
| A41.9 (Septicaemia, unspecified)                                                                              | 174           |                                   |               |
| A49.0 (Staphylococcal infection, unspecified)                                                                 | 2             |                                   |               |
| A49.1 (Streptococcal infection, unspecified)                                                                  | 1             |                                   |               |
| A49.8 (Other bacterial infections of unspecified site)                                                        | 3             |                                   |               |
| A49.9 (Bacterial infection, unspecified)                                                                      | 6             |                                   |               |
| B25.9 (Cytomegaloviral disease, unspecified)                                                                  | 1             |                                   |               |
| B49 (Unspecified mycosis)                                                                                     | 1             |                                   |               |
| B59 (Pneumocystosis)                                                                                          | 1             |                                   |               |
| B91 (Sequelae of poliomyelitis)                                                                               | 2             |                                   |               |
| B94.8 (Sequelae of other specified infectious and parasitic diseases)                                         | 3             |                                   |               |
| B99 (Other and unspecified infectious diseases)                                                               | 1             |                                   |               |
| C00-D48 (Neoplasms)                                                                                           | 20            | 0.0                               | 0-0           |
| C02.9 (Tongue, unspecified - Malignant neoplasms)                                                             | 1             |                                   |               |
| C18.2 (Ascending colon - Malignant neoplasms)                                                                 | 1             |                                   |               |
| C18.9 (Colon, unspecified - Malignant neoplasms)                                                              | 2             |                                   |               |
| C22.0 (Liver cell carcinoma - Malignant neoplasms)                                                            | 1             |                                   |               |
| C44.3 (Skin of other and unspecified parts of face - Malignant neoplasms)                                     | 1             |                                   |               |
| C50.9 (Breast, unspecified - Malignant neoplasms)                                                             | 3             |                                   |               |
| C61 (Malignant neoplasm of prostate)                                                                          | 2             |                                   |               |
| C64 (Malignant neoplasm of kidney, except renal pelvis)                                                       | 1             |                                   |               |
| C76.3 (Pelvis - Malignant neoplasms)                                                                          | 1             |                                   |               |
| C80 (Malignant neoplasm without specification of site)                                                        | 1             |                                   |               |
| C95.9 (Leukaemia, unspecified - Malignant neoplasms)                                                          | 1             |                                   |               |
| C96.9 (Malignant neoplasm of lymphoid, haematopoietic and related tissue, unspecified - Malignant neoplasms)  | 1             |                                   |               |
| D32.0 (Cerebral meninges - Benign neoplasms)                                                                  | 1             |                                   |               |

|                                                                                                               |     |     |         |
|---------------------------------------------------------------------------------------------------------------|-----|-----|---------|
| D40.1 (Testis - Uncertain neoplasms)                                                                          | 1   |     |         |
| D43.2 (Brain, unspecified - Uncertain neoplasms)                                                              | 1   |     |         |
| D46.9 (Myelodysplastic syndrome, unspecified - Uncertain neoplasms)                                           | 1   |     |         |
| D50-D89 (Diseases of the blood and blood-forming organs and certain disorders involving the immune mechanism) | 34  | 0.0 | 0-0     |
| D50.0 (Iron deficiency anaemia secondary to blood loss (chronic))                                             | 1   |     |         |
| D50.9 (Iron deficiency anaemia, unspecified)                                                                  | 1   |     |         |
| D56.9 (Thalassaemia, unspecified)                                                                             | 1   |     |         |
| D59.9 (Acquired haemolytic anaemia, unspecified)                                                              | 1   |     |         |
| D61.9 (Aplastic anaemia, unspecified)                                                                         | 2   |     |         |
| D62 (Acute posthaemorrhagic anaemia)                                                                          | 1   |     |         |
| D64.9 (Anaemia, unspecified)                                                                                  | 20  |     |         |
| D65 (Disseminated intravascular coagulation [defibrination syndrome])                                         | 1   |     |         |
| D69.3 (Idiopathic thrombocytopenic purpura)                                                                   | 1   |     |         |
| D69.4 (Other primary thrombocytopenia)                                                                        | 1   |     |         |
| D70 (Agranulocytosis)                                                                                         | 1   |     |         |
| D73.8 (Other diseases of spleen)                                                                              | 1   |     |         |
| D75.8 (Other specified diseases of blood and blood-forming organs)                                            | 1   |     |         |
| D86.9 (Sarcoidosis, unspecified)                                                                              | 1   |     |         |
| E00-E89 (Endocrine, nutritional and metabolic diseases)                                                       | 229 | 0.1 | 0.1-0.1 |
| E03.9 (Hypothyroidism, unspecified)                                                                           | 19  |     |         |
| E06.3 (Autoimmune thyroiditis)                                                                                | 1   |     |         |
| E10.9 (Insulin-dependent diabetes mellitus, without complications)                                            | 1   |     |         |
| E11.2 (Non-insulin-dependent diabetes mellitus, with renal complications)                                     | 1   |     |         |
| E11.4 (Non-insulin-dependent diabetes mellitus, with neurological complications)                              | 1   |     |         |
| E11.7 (Non-insulin-dependent diabetes mellitus, with multiple complications)                                  | 1   |     |         |
| E11.9 (Non-insulin-dependent diabetes mellitus, without complications)                                        | 16  |     |         |
| E14.2 (Unspecified diabetes mellitus, with renal complications)                                               | 2   |     |         |
| E14.5 (Unspecified diabetes mellitus, with peripheral circulatory complications)                              | 1   |     |         |
| E14.9 (Unspecified diabetes mellitus, without complications)                                                  | 25  |     |         |
| E16.2 (Hypoglycaemia, unspecified)                                                                            | 2   |     |         |
| E23.0 (Hypopituitarism)                                                                                       | 1   |     |         |
| E27.4 (Other and unspecified adrenocortical insufficiency)                                                    | 3   |     |         |
| E43 (Unspecified severe protein-energy malnutrition)                                                          | 12  |     |         |
| E44.0 (Moderate protein-energy malnutrition)                                                                  | 1   |     |         |

|                                                                                                                                                         |     |     |         |
|---------------------------------------------------------------------------------------------------------------------------------------------------------|-----|-----|---------|
| E45 (Retarded development following protein-energy malnutrition)                                                                                        | 2   |     |         |
| E46 (Unspecified protein-energy malnutrition)                                                                                                           | 57  |     |         |
| E63.9 (Nutritional deficiency, unspecified)                                                                                                             | 2   |     |         |
| E66.8 (Other obesity)                                                                                                                                   | 3   |     |         |
| E66.9 (Obesity, unspecified)                                                                                                                            | 8   |     |         |
| E70.1 (Other hyperphenylalaninaemias)                                                                                                                   | 1   |     |         |
| E71.3 (Disorders of fatty-acid metabolism)                                                                                                              | 1   |     |         |
| E72.2 (Disorders of urea cycle metabolism)                                                                                                              | 1   |     |         |
| E75.2 (Other sphingolipidosis)                                                                                                                          | 1   |     |         |
| E76.2 (Other mucopolysaccharidoses)                                                                                                                     | 1   |     |         |
| E77.1 (Defects in glycoprotein degradation)                                                                                                             | 1   |     |         |
| E78.0 (Pure hypercholesterolaemia)                                                                                                                      | 1   |     |         |
| E78.5 (Hyperlipidaemia, unspecified)                                                                                                                    | 16  |     |         |
| E78.9 (Disorder of lipoprotein metabolism, unspecified)                                                                                                 | 2   |     |         |
| E79.1 (Lesch-Nyhan syndrome)                                                                                                                            | 1   |     |         |
| E84.8 (Cystic fibrosis with other manifestations)                                                                                                       | 1   |     |         |
| E86 (Volume depletion)                                                                                                                                  | 15  |     |         |
| E87.0 (Hyperosmolality and hypernatraemia)                                                                                                              | 5   |     |         |
| E87.1 (Hypo-osmolality and hyponatraemia)                                                                                                               | 5   |     |         |
| E87.2 (Acidosis)                                                                                                                                        | 6   |     |         |
| E87.5 (Hyperkalaemia)                                                                                                                                   | 2   |     |         |
| E87.6 (Hypokalaemia)                                                                                                                                    | 2   |     |         |
| E87.7 (Fluid overload)                                                                                                                                  | 1   |     |         |
| E87.8 (Other disorders of electrolyte and fluid balance, not elsewhere classified)                                                                      | 2   |     |         |
| E88.9 (Metabolic disorder, unspecified)                                                                                                                 | 5   |     |         |
| <hr/>                                                                                                                                                   |     |     |         |
| F01-F99 (Mental and behavioural disorders)                                                                                                              | 154 | 0.1 | 0.1-0.1 |
| <hr/>                                                                                                                                                   |     |     |         |
| F01.9 (Vascular dementia, unspecified)                                                                                                                  | 5   |     |         |
| F03 (Unspecified dementia)                                                                                                                              | 16  |     |         |
| F09 (Unspecified organic or symptomatic mental disorder)                                                                                                | 1   |     |         |
| F17.9 (Mental and behavioural disorders due to use of tobacco, unspecified mental and behavioural disorder)                                             | 11  |     |         |
| F19.9 (Mental and behavioural disorders due to multiple drug use and use of other psychoactive substances, unspecified mental and behavioural disorder) | 1   |     |         |
| F20.0 (Paranoid schizophrenia)                                                                                                                          | 1   |     |         |
| F20.9 (Schizophrenia, unspecified)                                                                                                                      | 7   |     |         |
| F25.9 (Schizoaffective disorder, unspecified)                                                                                                           | 3   |     |         |
| F29 (Unspecified nonorganic psychosis)                                                                                                                  | 1   |     |         |
| F31.9 (Bipolar affective disorder, unspecified)                                                                                                         | 7   |     |         |
| F32.2 (Severe depressive episode without psychotic symptoms)                                                                                            | 3   |     |         |
| F32.9 (Depressive episode, unspecified)                                                                                                                 | 8   |     |         |

|                                                                         |      |     |         |
|-------------------------------------------------------------------------|------|-----|---------|
| F40.0 (Agoraphobia)                                                     | 1    |     |         |
| F41.9 (Anxiety disorder, unspecified)                                   | 6    |     |         |
| F45.9 (Somatoform disorder, unspecified)                                | 1    |     |         |
| F71 (Moderate mental retardation)                                       | 2    |     |         |
| F72 (Severe mental retardation)                                         | 6    |     |         |
| F73 (Profound mental retardation)                                       | 5    |     |         |
| F79 (Unspecified mental retardation)                                    | 52   |     |         |
| F81.9 (Developmental disorder of scholastic skills, unspecified)        | 6    |     |         |
| F84.0 (Childhood autism)                                                | 5    |     |         |
| F89 (Unspecified disorder of psychological development)                 | 3    |     |         |
| F91.2 (Socialized conduct disorder)                                     | 1    |     |         |
| F91.9 (Conduct disorder, unspecified)                                   | 1    |     |         |
| F95.2 (Combined vocal and multiple motor tic disorder [de la Tourette]) | 1    |     |         |
| <hr/>                                                                   |      |     |         |
| G00-G98 (Diseases of the nervous system)                                | 2344 | 1.0 | 0.9-1.0 |
| <hr/>                                                                   |      |     |         |
| G03.9 (Meningitis, unspecified)                                         | 1    |     |         |
| G04.9 (Encephalitis, myelitis and encephalomyelitis, unspecified)       | 1    |     |         |
| G09 (Sequelae of inflammatory diseases of central nervous system)       | 1    |     |         |
| G11.1 (Early-onset cerebellar ataxia)                                   | 1    |     |         |
| G14 (Postpolio syndrome)                                                | 1    |     |         |
| G20 (Parkinson disease)                                                 | 5    |     |         |
| G24.9 (Dystonia, unspecified)                                           | 2    |     |         |
| G25.0 (Essential tremor)                                                | 1    |     |         |
| G30.9 (Alzheimer disease, unspecified)                                  | 5    |     |         |
| G31.9 (Degenerative disease of nervous system, unspecified)             | 2    |     |         |
| G35 (Multiple sclerosis)                                                | 2    |     |         |
| G40.3 (Generalized idiopathic epilepsy and epileptic syndromes)         | 3    |     |         |
| G40.4 (Other generalized epilepsy and epileptic syndromes)              | 7    |     |         |
| G40.6 (Grand mal seizures, unspecified (with or without petit mal))     | 2    |     |         |
| G40.8 (Other epilepsy)                                                  | 1    |     |         |
| G40.9 (Epilepsy, unspecified)                                           | 110  |     |         |
| G41.9 (Status epilepticus, unspecified)                                 | 22   |     |         |
| G43.9 (Migraine, unspecified)                                           | 2    |     |         |
| G47.3 (Sleep apnoea)                                                    | 13   |     |         |
| G70.9 (Myoneural disorder, unspecified)                                 | 2    |     |         |
| G71.0 (Muscular dystrophy)                                              | 2    |     |         |
| G71.1 (Myotonic disorders)                                              | 2    |     |         |
| G80.0 (Spastic cerebral palsy)                                          | 42   |     |         |

|                                                                       |      |     |         |
|-----------------------------------------------------------------------|------|-----|---------|
| G80.1 (Spastic diplegia)                                              | 24   |     |         |
| G80.2 (Infantile hemiplegia)                                          | 16   |     |         |
| G80.3 (Dyskinetic cerebral palsy)                                     | 4    |     |         |
| G80.4 (Ataxic cerebral palsy)                                         | 3    |     |         |
| G80.8 (Other infantile cerebral palsy)                                | 87   |     |         |
| G80.9 (Infantile cerebral palsy, unspecified)                         | 1802 |     |         |
| G81.0 (Flaccid hemiplegia)                                            | 1    |     |         |
| G81.1 (Spastic hemiplegia)                                            | 2    |     |         |
| G81.9 (Hemiplegia, unspecified)                                       | 7    |     |         |
| G82.1 (Spastic paraplegia)                                            | 1    |     |         |
| G82.2 (Paraplegia, unspecified)                                       | 7    |     |         |
| G82.4 (Spastic tetraplegia)                                           | 25   |     |         |
| G82.5 (Tetraplegia, unspecified)                                      | 42   |     |         |
| G83.0 (Diplegia of upper limbs)                                       | 1    |     |         |
| G83.1 (Monoplegia of lower limb)                                      | 2    |     |         |
| G83.9 (Paralytic syndrome, unspecified)                               | 1    |     |         |
| G90.8 (Other disorders of autonomic nervous system)                   | 1    |     |         |
| G91.1 (Obstructive hydrocephalus)                                     | 2    |     |         |
| G91.9 (Hydrocephalus, unspecified)                                    | 13   |     |         |
| G93.1 (Anoxic brain damage, not elsewhere classified)                 | 48   |     |         |
| G93.4 (Encephalopathy, unspecified)                                   | 20   |     |         |
| G93.6 (Cerebral oedema)                                               | 2    |     |         |
| G93.7 (Reye syndrome)                                                 | 1    |     |         |
| G93.8 (Other specified disorders of brain)                            | 1    |     |         |
| G97.8 (Other postprocedural disorders of nervous system)              | 1    |     |         |
| <hr/>                                                                 |      |     |         |
| H00-H59 (Diseases of the eye and adnexa)                              | 5    |     |         |
| <hr/>                                                                 |      |     |         |
| H40.9 (Glaucoma, unspecified)                                         | 1    |     |         |
| H54.0 (Blindness, both eyes)                                          | 4    |     |         |
| <hr/>                                                                 |      |     |         |
| I00-I99 (Diseases of the circulatory system)                          | 528  | 0.2 | 0.2-0.2 |
| <hr/>                                                                 |      |     |         |
| I10 (Essential (primary) hypertension)                                | 83   |     |         |
| I11.9 (Hypertensive heart disease without (congestive) heart failure) | 10   |     |         |
| I12.0 (Hypertensive renal disease with renal failure)                 | 5    |     |         |
| I21.4 (Acute subendocardial myocardial infarction)                    | 2    |     |         |
| I21.9 (Acute myocardial infarction, unspecified)                      | 5    |     |         |
| I25.0 (Atherosclerotic cardiovascular disease, so described)          | 3    |     |         |
| I25.1 (Atherosclerotic heart disease)                                 | 10   |     |         |
| I25.9 (Chronic ischaemic heart disease, unspecified)                  | 1    |     |         |
| I26.9 (Pulmonary embolism without mention of acute cor pulmonale)     | 8    |     |         |

|                                                                                   |      |     |         |
|-----------------------------------------------------------------------------------|------|-----|---------|
| I27.2 (Other secondary pulmonary hypertension)                                    | 1    |     |         |
| I31.3 (Pericardial effusion (noninflammatory))                                    | 2    |     |         |
| I33.0 (Acute and subacute infective endocarditis)                                 | 1    |     |         |
| I42.9 (Cardiomyopathy, unspecified)                                               | 1    |     |         |
| I44.2 (Atrioventricular block, complete)                                          | 1    |     |         |
| I45.8 (Other specified conduction disorders)                                      | 1    |     |         |
| I46.1 (Sudden cardiac death, so described)                                        | 4    |     |         |
| I46.9 (Cardiac arrest, unspecified)                                               | 247  |     |         |
| I47.1 (Supraventricular tachycardia)                                              | 2    |     |         |
| I48 (Atrial fibrillation and flutter)                                             | 16   |     |         |
| I49.0 (Ventricular fibrillation and flutter)                                      | 1    |     |         |
| I49.9 (Cardiac arrhythmia, unspecified)                                           | 20   |     |         |
| I50.0 (Congestive heart failure)                                                  | 32   |     |         |
| I50.1 (Left ventricular failure)                                                  | 1    |     |         |
| I50.9 (Heart failure, unspecified)                                                | 13   |     |         |
| I51.6 (Cardiovascular disease, unspecified)                                       | 2    |     |         |
| I51.7 (Cardiomegaly)                                                              | 1    |     |         |
| I51.8 (Other ill-defined heart diseases)                                          | 2    |     |         |
| I51.9 (Heart disease, unspecified)                                                | 3    |     |         |
| I61.3 (Intracerebral haemorrhage in brain stem)                                   | 2    |     |         |
| I62.0 (Subdural haemorrhage (acute)(nontraumatic))                                | 3    |     |         |
| I63.9 (Cerebral infarction, unspecified)                                          | 1    |     |         |
| I64 (Stroke, not specified as haemorrhage or infarction)                          | 10   |     |         |
| I67.8 (Other specified cerebrovascular diseases)                                  | 1    |     |         |
| I67.9 (Cerebrovascular disease, unspecified)                                      | 3    |     |         |
| I69.1 (Sequelae of intracerebral haemorrhage)                                     | 1    |     |         |
| I69.2 (Sequelae of other nontraumatic intracranial haemorrhage)                   | 1    |     |         |
| I69.3 (Sequelae of cerebral infarction)                                           | 2    |     |         |
| I69.4 (Sequelae of stroke, not specified as haemorrhage or infarction)            | 3    |     |         |
| I69.8 (Sequelae of other and unspecified cerebrovascular diseases)                | 1    |     |         |
| I73.9 (Peripheral vascular disease, unspecified)                                  | 6    |     |         |
| I80.2 (Phlebitis and thrombophlebitis of other deep vessels of lower extremities) | 4    |     |         |
| I82.8 (Embolism and thrombosis of other specified veins)                          | 1    |     |         |
| I82.9 (Embolism and thrombosis of unspecified vein)                               | 1    |     |         |
| I83.0 (Varicose veins of lower extremities with ulcer)                            | 1    |     |         |
| I95.9 (Hypotension, unspecified)                                                  | 9    |     |         |
| <hr/>                                                                             |      |     |         |
| J00-J98 (Diseases of the respiratory system)                                      | 1110 | 0.5 | 0.4-0.5 |
| <hr/>                                                                             |      |     |         |
| J00 (Acute nasopharyngitis [common cold])                                         | 1    |     |         |
| J04.1 (Acute tracheitis)                                                          | 1    |     |         |

|                                                                                      |     |
|--------------------------------------------------------------------------------------|-----|
| J10.0 (Influenza with pneumonia, influenza virus identified)                         | 3   |
| J10.1 (Influenza with other respiratory manifestations, influenza virus identified)  | 1   |
| J12.9 (Viral pneumonia, unspecified)                                                 | 2   |
| J13 (Pneumonia due to Streptococcus pneumoniae)                                      | 2   |
| J15.0 (Pneumonia due to Klebsiella pneumoniae)                                       | 1   |
| J15.1 (Pneumonia due to Pseudomonas)                                                 | 3   |
| J15.2 (Pneumonia due to staphylococcus)                                              | 5   |
| J15.9 (Bacterial pneumonia, unspecified)                                             | 11  |
| J18.0 (Bronchopneumonia, unspecified)                                                | 5   |
| J18.1 (Lobar pneumonia, unspecified)                                                 | 3   |
| J18.2 (Hypostatic pneumonia, unspecified)                                            | 2   |
| J18.9 (Pneumonia, unspecified)                                                       | 202 |
| J21.9 (Acute bronchiolitis, unspecified)                                             | 1   |
| J36 (Peritonsillar abscess)                                                          | 1   |
| J39.8 (Other specified diseases of upper respiratory tract)                          | 3   |
| J40 (Bronchitis, not specified as acute or chronic)                                  | 4   |
| J42 (Unspecified chronic bronchitis)                                                 | 1   |
| J43.9 (Emphysema, unspecified)                                                       | 2   |
| J44.0 (Chronic obstructive pulmonary disease with acute lower respiratory infection) | 4   |
| J44.1 (Chronic obstructive pulmonary disease with acute exacerbation, unspecified)   | 1   |
| J44.8 (Other specified chronic obstructive pulmonary disease)                        | 1   |
| J44.9 (Chronic obstructive pulmonary disease, unspecified)                           | 27  |
| J45.9 (Asthma, unspecified)                                                          | 17  |
| J47 (Bronchiectasis)                                                                 | 2   |
| J69.0 (Pneumonitis due to food and vomit)                                            | 298 |
| J80 (Adult respiratory distress syndrome)                                            | 8   |
| J84.1 (Other interstitial pulmonary diseases with fibrosis)                          | 2   |
| J84.9 (Interstitial pulmonary disease, unspecified)                                  | 1   |
| J86.9 (Pyothorax without fistula)                                                    | 4   |
| J90 (Pleural effusion, not elsewhere classified)                                     | 3   |
| J93.9 (Pneumothorax, unspecified)                                                    | 1   |
| J94.8 (Other specified pleural conditions)                                           | 1   |
| J95.0 (Tracheostomy malfunction)                                                     | 1   |
| J95.8 (Other postprocedural respiratory disorders)                                   | 3   |
| J96.0 (Acute respiratory failure)                                                    | 163 |
| J96.1 (Chronic respiratory failure)                                                  | 89  |
| J96.9 (Respiratory failure, unspecified)                                             | 204 |
| J98.1 (Pulmonary collapse)                                                           | 3   |
| J98.4 (Other disorders of lung)                                                      | 15  |

|                                                                                                             |     |     |         |
|-------------------------------------------------------------------------------------------------------------|-----|-----|---------|
| J98.8 (Other specified respiratory disorders)                                                               | 5   |     |         |
| J98.9 (Respiratory disorder, unspecified)                                                                   | 3   |     |         |
| <hr/>                                                                                                       |     |     |         |
| K00-K92 (Diseases of the digestive system)                                                                  | 154 | 0.1 | 0.1-0.1 |
| <hr/>                                                                                                       |     |     |         |
| K05.1 (Chronic gingivitis)                                                                                  | 1   |     |         |
| K21.0 (Gastro-oesophageal reflux disease with oesophagitis)                                                 | 1   |     |         |
| K21.9 (Gastro-oesophageal reflux disease without oesophagitis)                                              | 21  |     |         |
| K22.1 (Ulcer of oesophagus)                                                                                 | 1   |     |         |
| K22.2 (Oesophageal obstruction)                                                                             | 3   |     |         |
| K22.4 (Dyskinesia of oesophagus)                                                                            | 2   |     |         |
| K22.6 (Gastro-oesophageal laceration-haemorrhage syndrome)                                                  | 1   |     |         |
| K22.7 (Barrett esophagus)                                                                                   | 3   |     |         |
| K22.8 (Other specified diseases of oesophagus)                                                              | 1   |     |         |
| K25.4 (Gastric ulcer, chronic or unspecified with haemorrhage)                                              | 1   |     |         |
| K26.4 (Duodenal ulcer, chronic or unspecified with haemorrhage)                                             | 1   |     |         |
| K26.6 (Duodenal ulcer, chronic or unspecified with both haemorrhage and perforation)                        | 1   |     |         |
| K27.4 (Peptic ulcer, site unspecified, chronic or unspecified with haemorrhage)                             | 1   |     |         |
| K27.9 (Peptic ulcer, site unspecified, unspecified as acute or chronic, without haemorrhage or perforation) | 1   |     |         |
| K29.5 (Chronic gastritis, unspecified)                                                                      | 1   |     |         |
| K29.7 (Gastritis, unspecified)                                                                              | 1   |     |         |
| K31.6 (Fistula of stomach and duodenum)                                                                     | 2   |     |         |
| K31.8 (Other specified diseases of stomach and duodenum)                                                    | 4   |     |         |
| K44.9 (Diaphragmatic hernia without obstruction or gangrene)                                                | 5   |     |         |
| K50.9 (Crohn disease, unspecified)                                                                          | 4   |     |         |
| K51.9 (Ulcerative colitis, unspecified)                                                                     | 1   |     |         |
| K52.9 (Noninfective gastroenteritis and colitis, unspecified)                                               | 1   |     |         |
| K55.0 (Acute vascular disorders of intestine)                                                               | 1   |     |         |
| K55.9 (Vascular disorder of intestine, unspecified)                                                         | 3   |     |         |
| K56.0 (Paralytic ileus)                                                                                     | 2   |     |         |
| K56.2 (Volvulus)                                                                                            | 2   |     |         |
| K56.3 (Gallstone ileus)                                                                                     | 1   |     |         |
| K56.4 (Other impaction of intestine)                                                                        | 1   |     |         |
| K56.6 (Other and unspecified intestinal obstruction)                                                        | 16  |     |         |
| K56.7 (Ileus, unspecified)                                                                                  | 8   |     |         |
| K58.9 (Irritable bowel syndrome without diarrhoea)                                                          | 1   |     |         |
| K59.0 (Constipation)                                                                                        | 11  |     |         |
| K59.3 (Megacolon, not elsewhere classified)                                                                 | 3   |     |         |



|                                                                                      |    |     |         |
|--------------------------------------------------------------------------------------|----|-----|---------|
| K59.9 (Functional intestinal disorder, unspecified)                                  | 1  |     |         |
| K62.9 (Disease of anus and rectum, unspecified)                                      | 1  |     |         |
| K63.1 (Perforation of intestine (nontraumatic))                                      | 5  |     |         |
| K63.2 (Fistula of intestine)                                                         | 2  |     |         |
| K63.8 (Other specified diseases of intestine)                                        | 1  |     |         |
| K63.9 (Disease of intestine, unspecified)                                            | 3  |     |         |
| K65.0 (Acute peritonitis)                                                            | 2  |     |         |
| K65.9 (Peritonitis, unspecified)                                                     | 2  |     |         |
| K74.6 (Other and unspecified cirrhosis of liver)                                     | 1  |     |         |
| K76.0 (Fatty (change of) liver, not elsewhere classified)                            | 1  |     |         |
| K76.9 (Liver disease, unspecified)                                                   | 2  |     |         |
| K80.2 (Calculus of gallbladder without cholecystitis)                                | 1  |     |         |
| K80.5 (Calculus of bile duct without cholangitis or cholecystitis)                   | 1  |     |         |
| K81.9 (Cholecystitis, unspecified)                                                   | 3  |     |         |
| K82.9 (Disease of gallbladder, unspecified)                                          | 1  |     |         |
| K85.9 (Acute pancreatitis, unspecified)                                              | 3  |     |         |
| K90.4 (Malabsorption due to intolerance, not elsewhere classified)                   | 1  |     |         |
| K91.3 (Postoperative intestinal obstruction)                                         | 1  |     |         |
| K91.8 (Other postprocedural disorders of digestive system, not elsewhere classified) | 2  |     |         |
| K92.1 (Melaena)                                                                      | 2  |     |         |
| K92.2 (Gastrointestinal haemorrhage, unspecified)                                    | 10 |     |         |
| K92.8 (Other specified diseases of digestive system)                                 | 1  |     |         |
| <hr/>                                                                                |    |     |         |
| L00-L98 (Diseases of the skin and subcutaneous tissue)                               | 41 | 0.0 | 0.0-0.0 |
| <hr/>                                                                                |    |     |         |
| L03.9 (Cellulitis, unspecified)                                                      | 3  |     |         |
| L08.9 (Local infection of skin and subcutaneous tissue, unspecified)                 | 1  |     |         |
| L40.5 (Arthropathic psoriasis)                                                       | 1  |     |         |
| L89.1 (Stage II decubitus ulcer)                                                     | 1  |     |         |
| L89.2 (Stage III decubitus ulcer)                                                    | 2  |     |         |
| L89.3 (Stage IV decubitus ulcer)                                                     | 7  |     |         |
| L89.9 (Decubitus ulcer and pressure area, unspecified)                               | 20 |     |         |
| L97 (Ulcer of lower limb, not elsewhere classified)                                  | 1  |     |         |
| L98.4 (Chronic ulcer of skin, not elsewhere classified)                              | 3  |     |         |
| L98.8 (Other specified disorders of skin and subcutaneous tissue)                    | 2  |     |         |
| <hr/>                                                                                |    |     |         |
| M00-M99 (Diseases of the musculoskeletal system and connective tissue)               | 58 | 0.0 | 0.0-0.0 |
| <hr/>                                                                                |    |     |         |
| M19.9 (Arthrosis, unspecified)                                                       | 3  |     |         |
| M24.5 (Contracture of joint)                                                         | 2  |     |         |
| M25.9 (Joint disorder, unspecified)                                                  | 1  |     |         |
| M41.0 (Infantile idiopathic scoliosis)                                               | 1  |     |         |

|                                                                        |     |     |         |
|------------------------------------------------------------------------|-----|-----|---------|
| M41.4 (Neuromuscular scoliosis)                                        | 6   |     |         |
| M41.8 (Other forms of scoliosis)                                       | 1   |     |         |
| M41.9 (Scoliosis, unspecified)                                         | 22  |     |         |
| M43.2 (Other fusion of spine)                                          | 1   |     |         |
| M46.2 (Osteomyelitis of vertebra)                                      | 1   |     |         |
| M47.8 (Other spondylosis)                                              | 1   |     |         |
| M48.0 (Spinal stenosis)                                                | 2   |     |         |
| M62.3 (Immobility syndrome (paraplegic))                               | 1   |     |         |
| M62.5 (Muscle wasting and atrophy, not elsewhere classified)           | 4   |     |         |
| M62.8 (Other specified disorders of muscle)                            | 3   |     |         |
| M79.7 (Fibromyalgia)                                                   | 1   |     |         |
| M81.9 (Osteoporosis, unspecified)                                      | 3   |     |         |
| M85.8 (Other specified disorders of bone density and structure)        | 1   |     |         |
| M86.9 (Osteomyelitis, unspecified)                                     | 4   |     |         |
| <hr/>                                                                  |     |     |         |
| N00-N99 (Diseases of the genitourinary system)                         | 165 | 0.1 | 0.1-0.1 |
| <hr/>                                                                  |     |     |         |
| N12 (Tubulo-interstitial nephritis, not specified as acute or chronic) | 1   |     |         |
| N13.0 (Hydronephrosis with ureteropelvic junction obstruction)         | 1   |     |         |
| N13.3 (Other and unspecified hydronephrosis)                           | 2   |     |         |
| N13.9 (Obstructive and reflux uropathy, unspecified)                   | 2   |     |         |
| N17.9 (Acute renal failure, unspecified)                               | 16  |     |         |
| N18.3 (Chronic kidney disease, stage 3)                                | 1   |     |         |
| N18.5 (Chronic kidney disease, stage 5)                                | 2   |     |         |
| N18.9 (Chronic renal failure, unspecified)                             | 10  |     |         |
| N19 (Unspecified renal failure)                                        | 10  |     |         |
| N20.0 (Calculus of kidney)                                             | 7   |     |         |
| N20.9 (Urinary calculus, unspecified)                                  | 1   |     |         |
| N28.8 (Other specified disorders of kidney and ureter)                 | 13  |     |         |
| N28.9 (Disorder of kidney and ureter, unspecified)                     | 2   |     |         |
| N31.9 (Neuromuscular dysfunction of bladder, unspecified)              | 18  |     |         |
| N32.8 (Other specified disorders of bladder)                           | 1   |     |         |
| N39.0 (Urinary tract infection, site not specified)                    | 74  |     |         |
| N39.9 (Disorder of urinary system, unspecified)                        | 1   |     |         |
| N40 (Hyperplasia of prostate)                                          | 3   |     |         |
| <hr/>                                                                  |     |     |         |
| P00-P96 (Certain conditions originating in the perinatal period)       | 7   |     | n/a     |
| <hr/>                                                                  |     |     |         |
| P07.2 (Extreme immaturity)                                             | 2   |     |         |
| P07.3 (Other preterm infants)                                          | 2   |     |         |
| P15.9 (Birth injury, unspecified)                                      | 1   |     |         |
| P90 (Convulsions of newborn)                                           | 2   |     |         |
| <hr/>                                                                  |     |     |         |

|                                                                                                   |     |     |         |
|---------------------------------------------------------------------------------------------------|-----|-----|---------|
| Q00-Q99 (Congenital malformations, deformations and chromosomal abnormalities)                    | 29  | 0.0 | 0.0-0.0 |
| Q24.0 (Dextrocardia)                                                                              | 1   |     |         |
| Q24.9 (Congenital malformation of heart, unspecified)                                             | 1   |     |         |
| Q25.6 (Stenosis of pulmonary artery)                                                              | 1   |     |         |
| Q32.1 (Other congenital malformations of trachea)                                                 | 1   |     |         |
| Q39.0 (Atresia of oesophagus without fistula)                                                     | 1   |     |         |
| Q60.0 (Renal agenesis, unilateral)                                                                | 1   |     |         |
| Q64.7 (Other congenital malformations of bladder and urethra)                                     | 1   |     |         |
| Q65.8 (Other congenital deformities of hip)                                                       | 1   |     |         |
| Q79.4 (Prune belly syndrome)                                                                      | 1   |     |         |
| Q79.6 (Ehlers-Danlos syndrome)                                                                    | 1   |     |         |
| Q82.3 (Incontinentia pigmenti)                                                                    | 1   |     |         |
| Q82.4 (Ectodermal dysplasia (anhidrotic))                                                         | 1   |     |         |
| Q85.0 (Neurofibromatosis (nonmalignant))                                                          | 1   |     |         |
| Q85.1 (Tuberous sclerosis)                                                                        | 1   |     |         |
| Q86.0 (Fetal alcohol syndrome (dysmorphic))                                                       | 2   |     |         |
| Q87.0 (Congenital malformation syndromes predominantly affecting facial appearance)               | 1   |     |         |
| Q87.1 (Congenital malformation syndromes predominantly associated with short stature)             | 1   |     |         |
| Q89.7 (Multiple congenital malformations, not elsewhere classified)                               | 1   |     |         |
| Q89.9 (Congenital malformation, unspecified)                                                      | 1   |     |         |
| Q90.9 (Down syndrome, unspecified)                                                                | 5   |     |         |
| Q93.5 (Other deletions of part of a chromosome)                                                   | 2   |     |         |
| Q93.9 (Deletion from autosomes, unspecified)                                                      | 1   |     |         |
| Q99.9 (Chromosomal abnormality, unspecified)                                                      | 1   |     |         |
| R00-R99 (Symptoms, signs and abnormal clinical and laboratory findings, not elsewhere classified) | 984 | 0.4 | 0.4-0.4 |
| R00.0 (Tachycardia, unspecified)                                                                  | 2   |     |         |
| R00.1 (Bradycardia, unspecified)                                                                  | 2   |     |         |
| R01.1 (Cardiac murmur, unspecified)                                                               | 2   |     |         |
| R02 (Gangrene, not elsewhere classified)                                                          | 1   |     |         |
| R06.0 (Dyspnoea)                                                                                  | 4   |     |         |
| R06.4 (Hyperventilation)                                                                          | 3   |     |         |
| R06.8 (Other and unspecified abnormalities of breathing)                                          | 18  |     |         |
| R09.0 (Asphyxia)                                                                                  | 52  |     |         |
| R09.2 (Respiratory arrest)                                                                        | 64  |     |         |
| R10.4 (Other and unspecified abdominal pain)                                                      | 2   |     |         |
| R11 (Nausea and vomiting)                                                                         | 10  |     |         |
| R13 (Dysphagia)                                                                                   | 205 |     |         |
| R15 (Faecal incontinence)                                                                         | 1   |     |         |

|                                                                                                    |     |     |         |
|----------------------------------------------------------------------------------------------------|-----|-----|---------|
| R18 (Ascites)                                                                                      | 2   |     |         |
| R19.8 (Other specified symptoms and signs involving the digestive system and abdomen)              | 1   |     |         |
| R25.2 (Cramp and spasm)                                                                            | 5   |     |         |
| R26.3 (Immobility)                                                                                 | 16  |     |         |
| R27.0 (Ataxia, unspecified)                                                                        | 2   |     |         |
| R27.8 (Other and unspecified lack of coordination)                                                 | 1   |     |         |
| R29.3 (Abnormal posture)                                                                           | 1   |     |         |
| R29.8 (Other and unspecified symptoms and signs involving the nervous and musculoskeletal systems) | 11  |     |         |
| R32 (Unspecified urinary incontinence)                                                             | 1   |     |         |
| R33 (Retention of urine)                                                                           | 4   |     |         |
| R41.8 (Other and unspecified symptoms and signs involving cognitive functions and awareness)       | 7   |     |         |
| R45.1 (Restlessness and agitation)                                                                 | 1   |     |         |
| R47.0 (Dysphasia and aphasia)                                                                      | 10  |     |         |
| R47.8 (Other and unspecified speech disturbances)                                                  | 1   |     |         |
| R50.9 (Fever, unspecified)                                                                         | 2   |     |         |
| R51 (Headache)                                                                                     | 1   |     |         |
| R52.2 (Other chronic pain)                                                                         | 1   |     |         |
| R53 (Malaise and fatigue)                                                                          | 29  |     |         |
| R54 (Senility)                                                                                     | 7   |     |         |
| R56.8 (Other and unspecified convulsions)                                                          | 309 |     |         |
| R57.0 (Cardiogenic shock)                                                                          | 3   |     |         |
| R57.8 (Other shock)                                                                                | 1   |     |         |
| R57.9 (Shock, unspecified)                                                                         | 6   |     |         |
| R58 (Haemorrhage, not elsewhere classified)                                                        | 2   |     |         |
| R62.8 (Other lack of expected normal physiological development)                                    | 88  |     |         |
| R62.9 (Lack of expected normal physiological development, unspecified)                             | 30  |     |         |
| R63.0 (Anorexia)                                                                                   | 7   |     |         |
| R63.3 (Feeding difficulties and mismanagement)                                                     | 2   |     |         |
| R63.4 (Abnormal weight loss)                                                                       | 8   |     |         |
| R63.6 (Insufficient intake of food and water due to self neglect)                                  | 2   |     |         |
| R64 (Cachexia)                                                                                     | 14  |     |         |
| R68.8 (Other specified general symptoms and signs)                                                 | 20  |     |         |
| R91 (Abnormal findings on diagnostic imaging of lung)                                              | 2   |     |         |
| R99 (Other ill-defined and unspecified causes of mortality)                                        | 21  |     |         |
| <hr/>                                                                                              |     |     |         |
| S00-T98 (Injury, poisoning and certain other consequences of external causes)                      | 170 | 0.1 | 0.1-0.1 |
| <hr/>                                                                                              |     |     |         |
| S06.9 (Intracranial injury, unspecified)                                                           | 3   |     |         |
| S12.9 (Fracture of neck, part unspecified)                                                         | 1   |     |         |
| S14.1 (Other and unspecified injuries of cervical spinal cord)                                     | 1   |     |         |

|                                                                                                           |     |
|-----------------------------------------------------------------------------------------------------------|-----|
| S19.9 (Unspecified injury of neck)                                                                        | 1   |
| S31.0 (Open wound of lower back and pelvis)                                                               | 1   |
| S31.8 (Open wound of other and unspecified parts of abdomen)                                              | 1   |
| S36.4 (Injury of small intestine)                                                                         | 1   |
| S39.9 (Unspecified injury of abdomen, lower back and pelvis)                                              | 2   |
| S72.0 (Fracture of neck of femur)                                                                         | 1   |
| S72.9 (Fracture of femur, part unspecified)                                                               | 1   |
| S82.2 (Fracture of shaft of tibia)                                                                        | 1   |
| S82.4 (Fracture of fibula alone)                                                                          | 1   |
| S82.8 (Fractures of other parts of lower leg)                                                             | 1   |
| T08 (Fracture of spine, level unspecified)                                                                | 1   |
| T11.0 (Superficial injury of upper limb, level unspecified)                                               | 1   |
| T13.9 (Unspecified injury of lower limb, level unspecified)                                               | 1   |
| T14.9 (Injury, unspecified)                                                                               | 1   |
| T17.8 (Foreign body in other and multiple parts of respiratory tract)                                     | 4   |
| T17.9 (Foreign body in respiratory tract, part unspecified)                                               | 122 |
| T18.9 (Foreign body in alimentary tract, part unspecified)                                                | 1   |
| T68 (Hypothermia)                                                                                         | 1   |
| T71 (Asphyxiation)                                                                                        | 1   |
| T74.0 (Neglect or abandonment)                                                                            | 1   |
| T75.1 (Drowning and nonfatal submersion)                                                                  | 2   |
| T81.0 (Haemorrhage and haematoma complicating a procedure, not elsewhere classified)                      | 1   |
| T83.5 (Infection and inflammatory reaction due to prosthetic device, implant and graft in urinary system) | 1   |
| T83.8 (Other complications of genitourinary prosthetic devices, implants and grafts)                      | 1   |
| T85.0 (Mechanical complication of ventricular intracranial (communicating) shunt)                         | 1   |
| T85.7 (Infection and inflammatory reaction due to other internal prosthetic devices, implants and grafts) | 2   |
| T85.8 (Other complications of internal prosthetic devices, implants and grafts, not elsewhere classified) | 2   |
| T91.8 (Sequelae of other specified injuries of neck and trunk)                                            | 1   |
| T93.1 (Sequelae of fracture of femur)                                                                     | 1   |
| T94.0 (Sequelae of injuries involving multiple body regions)                                              | 1   |
| T94.1 (Sequelae of injuries, not specified by body region)                                                | 1   |
| T96 (Sequelae of poisoning by drugs, medicaments and biological substances)                               | 1   |
| T98.0 (Sequelae of effects of foreign body entering through natural orifice)                              | 2   |

|                                                                                                                                                                                              |     |     |         |
|----------------------------------------------------------------------------------------------------------------------------------------------------------------------------------------------|-----|-----|---------|
| T98.1 (Sequelae of other and unspecified effects of external causes)                                                                                                                         | 1   |     |         |
| T98.3 (Sequelae of complications of surgical and medical care, not elsewhere classified)                                                                                                     | 2   |     |         |
| V01-Y89 (External causes of morbidity and mortality)                                                                                                                                         | 202 | 0.1 | 0.1-0.1 |
| W05 (Fall involving wheelchair)                                                                                                                                                              | 1   |     |         |
| W06 (Fall involving bed)                                                                                                                                                                     | 1   |     |         |
| W19 (Unspecified fall)                                                                                                                                                                       | 1   |     |         |
| W65 (Drowning and submersion while in bath-tub)                                                                                                                                              | 1   |     |         |
| W74 (Unspecified drowning and submersion)                                                                                                                                                    | 1   |     |         |
| W78 (Inhalation of gastric contents)                                                                                                                                                         | 7   |     |         |
| W79 (Inhalation and ingestion of food causing obstruction of respiratory tract)                                                                                                              | 13  |     |         |
| W80 (Inhalation and ingestion of other objects causing obstruction of respiratory tract)                                                                                                     | 126 |     |         |
| W84 (Unspecified threat to breathing)                                                                                                                                                        | 1   |     |         |
| X31 (Exposure to excessive natural cold (hypothermia))                                                                                                                                       | 1   |     |         |
| X59.0 (Exposure to unspecified factor causing fracture)                                                                                                                                      | 3   |     |         |
| X59.9 (Exposure to unspecified factor causing other and unspecified injury)                                                                                                                  | 7   |     |         |
| Y06.9 (By unspecified person)                                                                                                                                                                | 1   |     |         |
| Y34 (Unspecified event, undetermined intent)                                                                                                                                                 | 1   |     |         |
| Y83.0 (Surgical operation with transplant of whole organ)                                                                                                                                    | 1   |     |         |
| Y83.2 (Surgical operation with anastomosis, bypass or graft)                                                                                                                                 | 4   |     |         |
| Y83.3 (Surgical operation with formation of external stoma)                                                                                                                                  | 11  |     |         |
| Y83.6 (Removal of other organ (partial) (total))                                                                                                                                             | 2   |     |         |
| Y83.8 (Other surgical procedures)                                                                                                                                                            | 2   |     |         |
| Y83.9 (Surgical procedure, unspecified)                                                                                                                                                      | 1   |     |         |
| Y84.6 (Urinary catheterization)                                                                                                                                                              | 3   |     |         |
| Y84.8 (Other medical procedures)                                                                                                                                                             | 2   |     |         |
| Y86 (Sequelae of other accidents)                                                                                                                                                            | 6   |     |         |
| Y87.1 (Sequelae of assault)                                                                                                                                                                  | 1   |     |         |
| Y88.3 (Sequelae of surgical and medical procedures as the cause of abnormal reaction of the patient, or of later complication, without mention of misadventure at the time of the procedure) | 4   |     | n/a     |
